# Supplementary material for: Availability of secondary prevention services after stroke in Europe: An ESO/SAFE survey of national scientific societies and stroke experts
Source: PubMed Central journal article supplement (PMC6572590; doi:10.1177/2396987318816136), 2018-11-27
Supplement: Supplemental_Material3.pdf [file Supplemental_Material3.pdf]

| Country                     | Respondent 1       |                                                   |                                                                                         | Respondent 2      |                                     |                                                                     | Respondent 3         |                                            |                                                          |
|-----------------------------|--------------------|---------------------------------------------------|-----------------------------------------------------------------------------------------|-------------------|-------------------------------------|---------------------------------------------------------------------|----------------------|--------------------------------------------|----------------------------------------------------------|
|                             | Name               | Position in National Stroke Society               | Affiliation                                                                             | Name              | Position in National Stroke Society | Affiliation                                                         | Name                 | Position in National Stroke Society        | Affiliation                                              |
| <b>Albania</b>              | Petrela Mentor     | Member                                            | Mother Tereza University Hospital                                                       | Rroji Arben       | Member                              | Mother Tereza University Hospital                                   | Taka, Olsi           | Member                                     | Mother Tereza University Hospital                        |
| <b>Austria</b>              | Stefan Kiechl      | President                                         | Medical University of Innsbruck                                                         | Franz Fazekas     | Member                              | Medical University of Graz                                          | Michael Brainin      | Member                                     | Danube University Krems                                  |
| <b>Azerbaijan</b>           | Rana Shiraliyeva   | President of National Association of Neurologists | Azerbaijan State Advanced Training Institute for Doctors                                | Lala Tagizadeh    |                                     | Clinical medical center (former City hospital N1)                   | Rahim Aliyev         | Executive manager                          | Azerbaijan State Advanced Training Institute for Doctors |
| <b>Belgium</b>              | André Peeters      | President                                         | Cliniques universitaires St. Luc                                                        | Geert Van Hooren  | Secretary General                   | AZ St. Jan Brugge-Oostende                                          | Jacques De Keyser    | Past President                             | ZU Brussel VUB                                           |
| <b>Bosnia / Herzegovina</b> | Ivan Perić         |                                                   | Health Department, Tomislavgrad                                                         |                   |                                     |                                                                     |                      |                                            |                                                          |
| <b>Bulgaria</b>             | Ivan Milanov       | Member of National Steering Committee             | Medical University of Sofia                                                             | Dimitar Maslarov  | Member of Steering committee        | Medical University of Sofia, First MHAT                             | Staikov Ivan         |                                            | Acibadem City Clinic Tokuda Hospital                     |
| <b>Croatia</b>              | Hrvoje Budincevic  | Croatian Stroke Society President                 | 1) Sveti Duh University Hospital;<br>2) School of Medicine; University J.J. Strossmayer | Branko Malajcic   | EC Member                           | 1) University Hospital Center,<br>2) Zagreb School of Medicine,     |                      |                                            |                                                          |
| <b>Cyprus</b>               | Costas Michaelides | n/a                                               | American Medical Center                                                                 | George Kaponides  | n/a                                 | Ygeia Polyclinic                                                    | Ktriakos Ktrallis    | n/a                                        | Appoloneid Hospital                                      |
| <b>Czech Republic</b>       | Ales Tomek         | Chairman , Executive Committee                    | 2nd Medical Faculty, Charles University                                                 | Robert Mikulik    | Executive Committee                 | Masaryk University                                                  | Roman Herzig         | Executive Committee                        | Medical faculty Hradec Králové, Charles University       |
| <b>Denmark</b>              | Helle K Iversen    | Vice-chair                                        | Righospitalet                                                                           | Hanne Christensen | Chair                               | Bispebjerg Hospital                                                 | Søren Paaske Johnson | Member                                     | Aalborg University and Aalborg University Hospital       |
| <b>Estonia</b>              | Janika Kõrv        | Chair                                             | Department of Neurology and Neurosurgery, Tartu University Hospital                     | Riina Vibo        | Secretary                           | Department of Neurology and Neurosurgery, Tartu University Hospital | Siim Schneider       | Member                                     | Department of Neurology, North Estonia Medical Centre    |
| <b>Finland</b>              | Tiina Sarainen     | Chair of The Finnish Stroke Society               | Helsinki University Hospital                                                            | Daniel Strbian    | NA                                  | Helsinki University Hospital                                        | Risto Roine          | Finnish Brain Association, Chief Physician | Turku University Hospital                                |

|                   |                       |                                                                       |                                                                         |                         |                                                                              |                                                                                 |                    |                                          |                                                             |
|-------------------|-----------------------|-----------------------------------------------------------------------|-------------------------------------------------------------------------|-------------------------|------------------------------------------------------------------------------|---------------------------------------------------------------------------------|--------------------|------------------------------------------|-------------------------------------------------------------|
| <b>France</b>     | Serge Timsit          | President SFNV                                                        | CHRU Brest, Université de Bretagne                                      | Jean-Louis Mas          | Past President SFNV                                                          | Hôpital Sainte-Anne, Université Paris-Descartes                                 | Didier Leys        | Former president of the SFNV (1998-2000) | Univ-Lille. Inserm                                          |
| <b>Georgia</b>    | Alexander Tsiskaridze | President                                                             | Department of Neurology, Pineo Medical Ecosystem, Tbilisi               | Ioseb Burduladze        | Director                                                                     | Institute of Clinical Medicine                                                  | Sopio Sopromadze   | Member                                   | Pineo Medical Ecosystem                                     |
| <b>Germany</b>    | Martin Dichgans       | President                                                             | Klinikum der Universität München, LMU, Munich                           | Joachim Röther          | Past-President                                                               | Asklepios Klinik Altona                                                         | Matthias Endres    | Past President                           | Charité-Universitätsmedizin Berlin                          |
| <b>Greece</b>     | Georgios Tsivgoulis   | General Secretary of the Hellenic Society Of Cerebrovascular Diseases | Second Department of Neurology, "Attikon" Hospital University of Athens | Konstantinos Vadikolias | President                                                                    | Department of Neurology, Democritus University of Thrace                        | Panayiotis Mitsias | Member                                   | Department of Neurology Medical School, University of Crete |
| <b>Hungary</b>    | Óváry Csaba           | Board member                                                          | NICN                                                                    | Daniel Bereczki         | Past president                                                               | Semmelweis University, Department of Neurology                                  | Szapáry László     | President                                | Department of Neurology, University of Pecs                 |
| <b>Iceland</b>    | Björn Thorarinsson    |                                                                       | Landspítali University Hospital Reykjavik                               |                         |                                                                              |                                                                                 |                    |                                          |                                                             |
| <b>Ireland</b>    | Joseph Harbison       | PI of National Register and National Audit                            | University of Dublin, Trinity College                                   | Dominick McCabe         | Committee Member, Irish National Clinical Advisory Group on Stroke Medicine, | Dept of Neurology, Adelaide and Meath Hospital; Trinity College Dublin, Ireland | Ronan Collins      | National Clinical Lead in Stroke         | University of Dublin, Trinity College                       |
| <b>Israel</b>     | David Tanne           | President, Israeli Neurology Association                              | Sheba Medical Center, Tel Aviv University                               | Natan Bornstein         | Past President,                                                              | Shaare Zedek Medical Center                                                     | Ronen Leker        | Member                                   | Hadassah-Hebrew University Medical Center                   |
| <b>Italy</b>      | Danilo Toni           | President                                                             | University of Rome, Lasapienza                                          | Simona Sacco            | Member of the Board                                                          | University of L'Aquila                                                          | Maurizio Paciaroni | None                                     | University of Perugia                                       |
| <b>Kazakhstan</b> | Alma Zhusupova        | President, Association of Neurology of Kazakhstan                     | Astana Medical University                                               | Sholpan Nurmanova       | Member                                                                       | Astana Medical University                                                       | Zadash Muhambetova | Member                                   | City outpatient department #6                               |
| <b>Kyrgyzstan</b> | Inna Lutsenko         | Member                                                                | Kyrgyz State Medical Academy                                            | Abdusalim Artykbaev     | Chief                                                                        | Freelance Neurol. Bishkek City Civil Clinic                                     | Denis Titorenko    | Member                                   | Freelance Neurol. Bishkek City Civil Clinic                 |

|                    |                           |                                                                                 |                                                                   |                                 |                                                     |                                                                   |                    |                                                          |                                                                                             |
|--------------------|---------------------------|---------------------------------------------------------------------------------|-------------------------------------------------------------------|---------------------------------|-----------------------------------------------------|-------------------------------------------------------------------|--------------------|----------------------------------------------------------|---------------------------------------------------------------------------------------------|
| <b>Latvia</b>      | Evija Miglane             | President                                                                       | P.Stradins<br>Clinical<br>University<br>Hospital                  | Kristaps<br>Jurjans             | Member                                              | P.Stradins<br>Clinical<br>University<br>Hospital                  | Ilga Kikule        | Board member                                             | Riga East<br>University Hospital                                                            |
| <b>Lithuania</b>   | Aleksandras<br>Vilionskis | Member of<br>Council of<br>Lithuanian stroke<br>association                     | Republican<br>Vilnius University<br>Hospital,                     | Dalius<br>Jatuzis               | President of<br>Lithuanian<br>stroke<br>association | Vilnius<br>University,<br>Faculty of<br>Medicine                  | Daiva<br>Rastenyte | Vice-president<br>of Lithuanian<br>stroke<br>association | Lithuanian<br>University of Health<br>Sciences, the<br>Hospital of LSMU<br>"Kauno klinikos" |
| <b>Luxembourg</b>  | Dirk Droste               | Vascular working<br>group of the<br>neurology society                           | Centre<br>Hospitalier de<br>Luxembourg                            |                                 |                                                     |                                                                   |                    |                                                          |                                                                                             |
| <b>Macedonia</b>   | Anita<br>Arsovska         | Board member                                                                    | University Clinic<br>of Neurology                                 | Maja<br>Bozinovska-<br>Smiceska | President                                           | Special hospital<br>'St. Erasmo'                                  | Elena Lickova      | Member                                                   | Department of<br>Neurology                                                                  |
| <b>Moldova</b>     | Stanislav<br>Groppa       | President of<br>Moldavian Stroke<br>Association                                 | N.Testemiteanu<br>State Medical/<br>Pharmaceutical<br>University  | Eremai Zota                     | Secretary of<br>Moldavian<br>Stroke<br>Association  | N.Testemiteanu<br>State Medical<br>/Pharmaceutica<br>I University | Elena Manole       |                                                          | N.Testemiteanu<br>State Medical<br>/Pharmaceutical<br>University                            |
| <b>Montenegro</b>  | Mirjana<br>Cukic          |                                                                                 | Neurology Clinic<br>Clinical Centre of<br>Montenegro              | Ljiljana<br>Radulovic           |                                                     | Neurology<br>Clinic Clinical<br>Centre of<br>Montenegro           | Zlatana<br>Perovic |                                                          | General Hospital<br>Niksic                                                                  |
| <b>Netherlands</b> | Diederik<br>Dippel        | Chair of national<br>stroke work group                                          | Erasmus MC,<br>University<br>medical center                       | Bart van der<br>Worp            | Member                                              | UMC Utrecht                                                       | Yvo Roos           | Member                                                   | AMC Amsterdam                                                                               |
| <b>Norway</b>      | Lars<br>Thomassen         | Leader                                                                          | Haukeland<br>University<br>Hospital                               | Anne Hege<br>Aamodt             | Leader<br>Norwegian<br>Neurology<br>Association     | Oslo University<br>Hospital                                       | Martin Kurz        | Treasurer                                                | Stavanger<br>University Hospital                                                            |
| <b>Poland</b>      | Anna<br>Czlonkowska       | President of<br>Cerebrovascular<br>Section of Polish<br>Neurological<br>Society | Institute of<br>Psychiatry and<br>Neurology                       | Dariusz<br>Gasecki              | Co-worker of<br>Polish Stroke<br>Initiative         | Medical<br>University of<br>Gdansk                                |                    |                                                          |                                                                                             |
| <b>Portugal</b>    | Miguel<br>Rodrigues       | Treasurer<br>(Portuguese<br>Stroke Society)                                     | Hospital Garcia<br>de Orta                                        | Elsa<br>Azevedo                 | Vice-president<br>(Portuguese<br>Stroke Society)    | Centro<br>Hospitalar<br>São João                                  | Manuel<br>Correia  | President<br>(Neurology<br>Society)                      | Centro Hospitalar<br>do Porto                                                               |
| <b>Romania</b>     | Cristina Tiu              | Future president<br>(Romanian<br>Society of<br>Neurology)                       | University<br>hospital                                            | Sorin Tuta                      | Vice-president                                      | Institute of<br>Cerebrovascula<br>r Disorders                     | Ovidiu<br>Bajenaru | Honorary<br>president<br>ad vitam                        | University hospital                                                                         |
| <b>Russia</b>      | Nikolay<br>Shamalov       |                                                                                 | Pirogov Russian<br>National<br>Research<br>Medical<br>University, |                                 |                                                     |                                                                   |                    |                                                          |                                                                                             |

|                          |                              |                                           |                                                            |                        |                                        |                                               |                  |                                      |                                             |
|--------------------------|------------------------------|-------------------------------------------|------------------------------------------------------------|------------------------|----------------------------------------|-----------------------------------------------|------------------|--------------------------------------|---------------------------------------------|
| <b>Scotland</b>          | Jesse Dawson                 | Lead, Stroke Research Network             | University of Glasgow / NHSGGC                             | Fergus Doubal          | Chair, Clinical Standards Committee    | NHS Lothian                                   |                  |                                      |                                             |
| <b>Serbia</b>            | Ljiljana Beslać Bumbaširević | President of National Board for neurology | Neurology Clinic, Clinical Center of Serbia                | Marija Žarkov          | Member of National Board for neurology | Neurology Clinic, Clinical Center Vojvodina   |                  |                                      |                                             |
| <b>Slovakia</b>          | Peter Turcani                | Member of executive committee             | Department of Neurology, Comenius University, Bratislava   |                        |                                        |                                               |                  |                                      |                                             |
| <b>Slovenia</b>          | Zvan Bojana                  | President of the National Stroke Society  | University Medical Centre Ljubljana, Slovenia              | Anita Resman Gaspersic |                                        | University Medical Centre Ljubljana, Slovenia |                  |                                      |                                             |
| <b>Spain</b>             | María Alonso de Leciñana     | Head of the Executive Committee           | University Hospital La Paz                                 | Óscar Ayo              | Member of the Executive Committee      | University Hospital Albacete                  | Mar Castellanos  | Secretary of the Executive Committee | University Hospital A Coruña                |
| <b>Sweden</b>            | Michael Mazya                | Chair, Swedish Acute Neurology Society    | Karolinska University Hospital / Karolinska Institutet     | Bo Norrving            | Chair, Swedish Stroke Register         | Skåne University Hospital / Lund University   | Jesper Petersson |                                      | Skåne University Hospital / Lund University |
| <b>Switzerland</b>       | Marcel Arnold                | Chair                                     | University Hospital, Bern                                  | Leo Bonati             | Coordinator Swiss Stroke Registry      | University Hospital, Basel                    | Hakan Sarikaya   | Co-chair of stroke task force        | University hospital Bern                    |
| <b>Turkey</b>            | Ethem Murat Arsava           | General Secretary                         | Hacettepe University                                       | Ibrahim Levent Gungor  | Board Member                           | Ondokuz Mayıs University                      | Kursad Kutluk    | Former President                     | Dokuz Eylul University                      |
| <b>UK (exc Scotland)</b> | Fergus Doubal                | Chair Clinical Standards Committee        | NHS Lothian                                                | Thompson Robinson      | President                              | University of Leicester                       |                  |                                      |                                             |
| <b>Ukraine</b>           | Mykola Polishchuk            | President                                 | Shupik National Medical Academy of Post-Graduate Education | Tamara Mishchenko      | Fellow                                 | Karazin Kharkiv National University           | Yuriy Flomin     | Board member                         | Medical Center 'Universal Clinic "Oberig"   |
| <b>Uzbekistan</b>        | Gafurov Bahtiyar             | Chief, advanced training of doctors       | Tashkent                                                   |                        |                                        |                                               |                  |                                      |                                             |
