# Supplementary material for: Availability of secondary prevention services after stroke in Europe: An ESO/SAFE survey of national scientific societies and stroke experts
Source: PubMed Central journal article supplement (PMC6572590; doi:10.1177/2396987318816136), 2018-11-27
Supplement: Supplemental_Material4.pdf [file Supplemental_Material4.pdf]

# APPENDIX 2

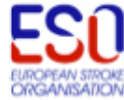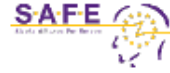

## ESO/SAFE Survey on Secondary Prevention for Stroke

|                                                       |                                                                                                                                                                |                                                                                                                                                                |                                                                                                                                                                |
|-------------------------------------------------------|----------------------------------------------------------------------------------------------------------------------------------------------------------------|----------------------------------------------------------------------------------------------------------------------------------------------------------------|----------------------------------------------------------------------------------------------------------------------------------------------------------------|
| <b>Name of the country/region you represent</b>       |                                                                                                                                                                | <b>Date of Completion</b>                                                                                                                                      |                                                                                                                                                                |
|                                                       |                                                                                                                                                                |                                                                                                                                                                |                                                                                                                                                                |
|                                                       | <b>First Respondent</b>                                                                                                                                        | <b>Second Respondent</b>                                                                                                                                       | <b>Third Respondent</b>                                                                                                                                        |
| <b>Name</b> <i>(Last, First):</i>                     |                                                                                                                                                                |                                                                                                                                                                |                                                                                                                                                                |
| <b>Career level:</b>                                  | <input type="checkbox"/> Department Head<br><input type="checkbox"/> Senior Physician                                                                          | <input type="checkbox"/> Department Head<br><input type="checkbox"/> Senior Physician                                                                          | <input type="checkbox"/> Department Head<br><input type="checkbox"/> Senior Physician                                                                          |
| <b>Specialty</b>                                      | <input type="checkbox"/> Neurology<br><input type="checkbox"/> Stroke Physician<br><input type="checkbox"/> Geratology<br><input type="checkbox"/> Other _____ | <input type="checkbox"/> Neurology<br><input type="checkbox"/> Stroke Physician<br><input type="checkbox"/> Geratology<br><input type="checkbox"/> Other _____ | <input type="checkbox"/> Neurology<br><input type="checkbox"/> Stroke Physician<br><input type="checkbox"/> Geratology<br><input type="checkbox"/> Other _____ |
| <b>e-mail :</b>                                       |                                                                                                                                                                |                                                                                                                                                                |                                                                                                                                                                |
| <b>European Stroke/Neurology organisation Member?</b> | <input type="checkbox"/> None <input checked="" type="checkbox"/> ESO<br><input type="checkbox"/> Other _____                                                  | <input type="checkbox"/> None <input type="checkbox"/> ESO<br><input type="checkbox"/> Other _____                                                             | <input type="checkbox"/> None <input type="checkbox"/> ESO<br><input type="checkbox"/> Other _____                                                             |
| <b>Position in national stroke organisation:</b>      |                                                                                                                                                                |                                                                                                                                                                |                                                                                                                                                                |
| <b>Institution</b>                                    |                                                                                                                                                                |                                                                                                                                                                |                                                                                                                                                                |
| <b>City</b>                                           |                                                                                                                                                                |                                                                                                                                                                |                                                                                                                                                                |

### PART 1. STROKE REGISTRIES AND QUALITY CONTROL

|                                                                                                                                                        |                                                                                                                                                                                                                                                                                                                                                                                                                                                                                                                                                                                                                                                                                                                                                                                                                                         |
|--------------------------------------------------------------------------------------------------------------------------------------------------------|-----------------------------------------------------------------------------------------------------------------------------------------------------------------------------------------------------------------------------------------------------------------------------------------------------------------------------------------------------------------------------------------------------------------------------------------------------------------------------------------------------------------------------------------------------------------------------------------------------------------------------------------------------------------------------------------------------------------------------------------------------------------------------------------------------------------------------------------|
| <b>In your country, do you have a stroke registry that includes secondary prevention measures?</b>                                                     | <input type="checkbox"/> National <input type="checkbox"/> Hospital-based <input type="checkbox"/> No <input type="checkbox"/> Unknown<br><input type="checkbox"/> For specific treatments only: _____                                                                                                                                                                                                                                                                                                                                                                                                                                                                                                                                                                                                                                  |
| <b>What proportion of stroke patients are covered by the registry?</b>                                                                                 | _____ %                                                                                                                                                                                                                                                                                                                                                                                                                                                                                                                                                                                                                                                                                                                                                                                                                                 |
| <b>If yes, which of the following characteristics apply to your registry/registries?</b> (Please tick all that apply)                                  | <input type="checkbox"/> Informed consent <input type="checkbox"/> Prospective<br><input type="checkbox"/> Population-based <input type="checkbox"/> Used for benchmarking<br><input type="checkbox"/> Health administration data <input type="checkbox"/> Available for research                                                                                                                                                                                                                                                                                                                                                                                                                                                                                                                                                       |
| <b>If yes, select which data can be derived from your registry</b><br>(Please tick all that apply)                                                     | No of patients having:<br><input type="checkbox"/> Ischaemic stroke <input type="checkbox"/> TIA <input type="checkbox"/> Haemorrhage<br><input type="checkbox"/> MRI brain <input type="checkbox"/> CT brain<br><input type="checkbox"/> MRA <input type="checkbox"/> Doppler <input type="checkbox"/> CTA<br><input type="checkbox"/> Endarterectomy <input type="checkbox"/> Carotid stenting<br><input type="checkbox"/> Cardiac monitoring <input type="checkbox"/> PFO closure<br>No of patients prescribed:<br><input type="checkbox"/> Antihypertensives <input type="checkbox"/> Antiplatelets <input type="checkbox"/> Statins<br><input type="checkbox"/> Anticoagulation <input type="checkbox"/> Novel oral anticoagulants<br><input type="checkbox"/> Time to TIA assessment <input type="checkbox"/> Follow up frequency |
| <b>If you use real-life data to complete this form (stroke registry / healthcare / extrapolation of local data), please describe this data source:</b> |                                                                                                                                                                                                                                                                                                                                                                                                                                                                                                                                                                                                                                                                                                                                                                                                                                         |

### PART 2. ORGANISATION OF STROKE SYSTEMS OF CARE: SECONDARY PREVENTION

|                                                                                                                    |                                                                                                                                                                                                                                                                          |
|--------------------------------------------------------------------------------------------------------------------|--------------------------------------------------------------------------------------------------------------------------------------------------------------------------------------------------------------------------------------------------------------------------|
| <b>Which guidelines are used in your country for stroke?</b> <i>(Tick as many as apply)</i>                        | <input type="checkbox"/> ESO <input type="checkbox"/> AHA/Stroke <input type="checkbox"/> National <input type="checkbox"/> Others <input type="checkbox"/> None                                                                                                         |
| <b>Do you have national guidelines covering secondary prevention after TIA or stroke?</b>                          | Yes <input type="checkbox"/> No <input type="checkbox"/> Unknown <input type="checkbox"/>                                                                                                                                                                                |
| <b>In your country, at what level do any healthcare strategies operate to improve secondary stroke prevention?</b> | <input type="checkbox"/> No stroke specific strategic plans exist<br><input type="checkbox"/> Country-wide <input type="checkbox"/> Regional<br><input type="checkbox"/> Hospital only <input type="checkbox"/> For primary care<br><input type="checkbox"/> Other _____ |
| <b>Which specific secondary prevention interventions are used?</b>                                                 | <input type="checkbox"/> Lifestyle management course <input type="checkbox"/> Cardiac Monitoring (<72hr)<br><input type="checkbox"/> Outpatient TIA Assessment <input type="checkbox"/> Cardiac Monitoring (>72 hours)                                                   |

| PART 3. ASSESSMENT AFTER STROKE / TIA FOR SECONDARY PREVENTION                                                                                                                                                                                                                                                             |                                                                                                                                                                                                                                                                                                                                                                                                                                                                                                                                                                                                                                                                                                                                                                                                                                                                                                                                                                                                     |
|----------------------------------------------------------------------------------------------------------------------------------------------------------------------------------------------------------------------------------------------------------------------------------------------------------------------------|-----------------------------------------------------------------------------------------------------------------------------------------------------------------------------------------------------------------------------------------------------------------------------------------------------------------------------------------------------------------------------------------------------------------------------------------------------------------------------------------------------------------------------------------------------------------------------------------------------------------------------------------------------------------------------------------------------------------------------------------------------------------------------------------------------------------------------------------------------------------------------------------------------------------------------------------------------------------------------------------------------|
| <p><b>What percentage of patients with TIA are formally assessed by:</b><br/><i>(if available, give number, otherwise select quintile by strikethrough)</i></p> <p><b>Is data from:</b>      <input type="checkbox"/> Estimation<br/><input type="checkbox"/> Healthcare records   <input type="checkbox"/> Registry</p>   | <p>admission to hospital      ___ <input type="checkbox"/>0-20 <input checked="" type="checkbox"/>20-40 <input type="checkbox"/>40-60 <input type="checkbox"/>60-80 <input type="checkbox"/>80-100</p> <p>the acute stroke service      ___ <input type="checkbox"/>0-20 <input type="checkbox"/>20-40 <input type="checkbox"/>40-60 <input type="checkbox"/>60-80 <input type="checkbox"/>80-100</p> <p>a separate TIA clinic      ___ <input type="checkbox"/>0-20 <input type="checkbox"/>20-40 <input checked="" type="checkbox"/>40-60 <input type="checkbox"/>60-80 <input type="checkbox"/>80-100</p> <p>a general medical clinic      ___ <input type="checkbox"/>0-20 <input type="checkbox"/>20-40 <input type="checkbox"/>40-60 <input type="checkbox"/>60-80 <input type="checkbox"/>80-100</p> <p>primary care only      ___ <input type="checkbox"/>0-20 <input type="checkbox"/>20-40 <input type="checkbox"/>40-60 <input type="checkbox"/>60-80 <input type="checkbox"/>80-100</p> |
| <p><b>What is the guideline-recommended interval between referral and completion of assessment for TIA?</b></p>                                                                                                                                                                                                            | <p><input type="checkbox"/> <b>None</b>      High-risk      Low-risk      <b>OR</b>      All <i>(if no distinction)</i><br/>                                         ___ days      ___ days      ___ days</p>                                                                                                                                                                                                                                                                                                                                                                                                                                                                                                                                                                                                                                                                                                                                                                                       |
| <p><b>What percentage of patients with TIA are assessed within...</b><br/><b>Is data from:</b>      <input type="checkbox"/> Estimation<br/><input type="checkbox"/> Healthcare records   <input type="checkbox"/> Registry</p>                                                                                            | <p>Same day      ___      <input type="checkbox"/>0-20 <input type="checkbox"/>20-40 <input type="checkbox"/>40-60 <input type="checkbox"/>60-80 <input type="checkbox"/>80-100</p> <p>Within 48 hours      ___      <input type="checkbox"/>0-20 <input type="checkbox"/>20-40 <input type="checkbox"/>40-60 <input type="checkbox"/>60-80 <input type="checkbox"/>80-100</p> <p>Within 1 week      ___      <input type="checkbox"/>0-20 <input type="checkbox"/>20-40 <input type="checkbox"/>40-60 <input type="checkbox"/>60-80 <input type="checkbox"/>80-100</p> <p>&gt; 1 week      ___      <input type="checkbox"/>0-20 <input type="checkbox"/>20-40 <input type="checkbox"/>40-60 <input type="checkbox"/>60-80 <input type="checkbox"/>80-100</p>                                                                                                                                                                                                                                      |
| <p><b>What percentage of TIA/stroke patients undergo carotid imaging...</b><br/><i>if available, give number, otherwise select quintile by strikethrough)</i></p> <p><b>Is data from:</b>      <input type="checkbox"/> Estimation<br/><input type="checkbox"/> Healthcare records   <input type="checkbox"/> Registry</p> | <p>by ultrasound      ___      <input type="checkbox"/>0-20 <input type="checkbox"/>20-40 <input type="checkbox"/>40-60 <input type="checkbox"/>60-80 <input type="checkbox"/>80-100</p> <p>by CTA      ___      <input type="checkbox"/>0-20 <input type="checkbox"/>20-40 <input type="checkbox"/>40-60 <input type="checkbox"/>60-80 <input type="checkbox"/>80-100</p> <p>by MRA      ___      <input type="checkbox"/>0-20 <input type="checkbox"/>20-40 <input type="checkbox"/>40-60 <input type="checkbox"/>60-80 <input type="checkbox"/>80-100</p> <p>by ≥2 modalities      ___      <input type="checkbox"/>0-20 <input type="checkbox"/>20-40 <input type="checkbox"/>40-60 <input type="checkbox"/>60-80 <input type="checkbox"/>80-100</p> <p>Not imaged      ___      <input type="checkbox"/>0-20 <input type="checkbox"/>20-40 <input type="checkbox"/>40-60 <input type="checkbox"/>60-80 <input type="checkbox"/>80-100</p>                                                      |
| <p><b>What form of monitoring is most often used to exclude paroxysmal AF in appropriate patients?</b></p>                                                                                                                                                                                                                 | <p>ECG only      ___      <input type="checkbox"/>0-20 <input type="checkbox"/>20-40 <input type="checkbox"/>40-60 <input type="checkbox"/>60-80 <input type="checkbox"/>80-100</p> <p>24-48 hr Holter      ___      <input type="checkbox"/>0-20 <input type="checkbox"/>20-40 <input type="checkbox"/>40-60 <input type="checkbox"/>60-80 <input type="checkbox"/>80-100</p> <p>&gt;48 h monitor      ___      <input type="checkbox"/>0-20 <input type="checkbox"/>20-40 <input type="checkbox"/>40-60 <input type="checkbox"/>60-80 <input type="checkbox"/>80-100</p>                                                                                                                                                                                                                                                                                                                                                                                                                          |
| <p><b>For secondary prevention purposes, what percentage of patients with ischaemic stroke / TIA undergo...</b></p> <p><b>Is data from:</b>      <input type="checkbox"/> Estimation<br/><input type="checkbox"/> Healthcare records   <input type="checkbox"/> Registry</p>                                               | <p>Transthoracic Echo      ___      <input type="checkbox"/>0-20 <input type="checkbox"/>20-40 <input type="checkbox"/>40-60 <input type="checkbox"/>60-80 <input type="checkbox"/>80-100</p> <p>Transoesophageal Echo      ___      <input type="checkbox"/>0-20 <input type="checkbox"/>20-40 <input type="checkbox"/>40-60 <input type="checkbox"/>60-80 <input type="checkbox"/>80-100</p> <p>Transcranial ultrasound      ___      <input type="checkbox"/>0-20 <input type="checkbox"/>20-40 <input type="checkbox"/>40-60 <input type="checkbox"/>60-80 <input type="checkbox"/>80-100</p> <p>Intracranial MRA / CTA      ___      <input type="checkbox"/>0-20 <input type="checkbox"/>20-40 <input type="checkbox"/>40-60 <input type="checkbox"/>60-80 <input type="checkbox"/>80-100</p> <p>Other _____      ___      <input type="checkbox"/>0-20 <input type="checkbox"/>20-40 <input type="checkbox"/>40-60 <input type="checkbox"/>60-80 <input type="checkbox"/>80-100</p>          |
| <p><b>What percentage of patients have blood pressure monitoring after initial treatment after stroke by...</b></p>                                                                                                                                                                                                        | <p>Primary care only      <input type="checkbox"/>0-20 <input type="checkbox"/>20-40 <input type="checkbox"/>40-60 <input type="checkbox"/>60-80 <input type="checkbox"/>80-100</p> <p>Hospital Clinic / BP      <input type="checkbox"/>0-20 <input type="checkbox"/>20-40 <input type="checkbox"/>40-60 <input type="checkbox"/>60-80 <input type="checkbox"/>80-100</p> <p>Home / ambulatory device      <input type="checkbox"/>0-20 <input type="checkbox"/>20-40 <input type="checkbox"/>40-60 <input type="checkbox"/>60-80 <input type="checkbox"/>80-100</p>                                                                                                                                                                                                                                                                                                                                                                                                                               |
| <p><b>In your country, what is the usual target blood pressure after stroke?</b><br/>From: <input type="checkbox"/> Guidelines   <input type="checkbox"/> Usual practice</p>                                                                                                                                               | <p>Age &lt;70 ___ / ___ mmHg   <input type="checkbox"/> All patients are treated regardless of BP</p> <p>Age &gt;70 ___ / ___ mmHg</p>                                                                                                                                                                                                                                                                                                                                                                                                                                                                                                                                                                                                                                                                                                                                                                                                                                                              |

**PART 4. MANAGEMENT**

| <p><b>Which lifestyle management programs are available to the majority of stroke patients as part of their medical care ?</b></p> | <p>Combined risk factor management programs      <input type="checkbox"/></p> <p>Physical activity programs      <input type="checkbox"/></p> <p>Smoking cessation support      <input type="checkbox"/></p> <p>Weight loss programs      <input type="checkbox"/></p> <p>Other _____</p>                                                                                                                                                                                                                                                                                                                                                                                                                                                                                                                                                                                                                |                          |                          |        |                  |                           |                          |                          |                          |                               |                          |                          |                          |              |                          |                          |                          |                       |                          |                          |                          |                          |                          |                          |                          |
|------------------------------------------------------------------------------------------------------------------------------------|----------------------------------------------------------------------------------------------------------------------------------------------------------------------------------------------------------------------------------------------------------------------------------------------------------------------------------------------------------------------------------------------------------------------------------------------------------------------------------------------------------------------------------------------------------------------------------------------------------------------------------------------------------------------------------------------------------------------------------------------------------------------------------------------------------------------------------------------------------------------------------------------------------|--------------------------|--------------------------|--------|------------------|---------------------------|--------------------------|--------------------------|--------------------------|-------------------------------|--------------------------|--------------------------|--------------------------|--------------|--------------------------|--------------------------|--------------------------|-----------------------|--------------------------|--------------------------|--------------------------|--------------------------|--------------------------|--------------------------|--------------------------|
| <p><b>If available, who usually provides these lifestyle management programs?</b></p>                                              | <p>Hospital stroke services      <input type="checkbox"/></p> <p>Primary care      <input type="checkbox"/></p> <p>Stroke-specific charitable organisations      <input type="checkbox"/></p>                                                                                                                                                                                                                                                                                                                                                                                                                                                                                                                                                                                                                                                                                                            |                          |                          |        |                  |                           |                          |                          |                          |                               |                          |                          |                          |              |                          |                          |                          |                       |                          |                          |                          |                          |                          |                          |                          |
| <p><b>Where are these medical treatments usually initiated:</b></p>                                                                | <table border="0"> <thead> <tr> <th></th> <th>Antiplatelet</th> <th>Statin</th> <th>Antihypertensive</th> </tr> </thead> <tbody> <tr> <td>Acutely by paramedic / GP</td> <td><input type="checkbox"/></td> <td><input type="checkbox"/></td> <td><input type="checkbox"/></td> </tr> <tr> <td>As inpatients / in TIA clinic</td> <td><input type="checkbox"/></td> <td><input type="checkbox"/></td> <td><input type="checkbox"/></td> </tr> <tr> <td>On discharge</td> <td><input type="checkbox"/></td> <td><input type="checkbox"/></td> <td><input type="checkbox"/></td> </tr> <tr> <td>In a follow-up clinic</td> <td><input type="checkbox"/></td> <td><input type="checkbox"/></td> <td><input type="checkbox"/></td> </tr> <tr> <td>Deferred to primary care</td> <td><input type="checkbox"/></td> <td><input type="checkbox"/></td> <td><input type="checkbox"/></td> </tr> </tbody> </table> |                          | Antiplatelet             | Statin | Antihypertensive | Acutely by paramedic / GP | <input type="checkbox"/> | <input type="checkbox"/> | <input type="checkbox"/> | As inpatients / in TIA clinic | <input type="checkbox"/> | <input type="checkbox"/> | <input type="checkbox"/> | On discharge | <input type="checkbox"/> | <input type="checkbox"/> | <input type="checkbox"/> | In a follow-up clinic | <input type="checkbox"/> | <input type="checkbox"/> | <input type="checkbox"/> | Deferred to primary care | <input type="checkbox"/> | <input type="checkbox"/> | <input type="checkbox"/> |
|                                                                                                                                    | Antiplatelet                                                                                                                                                                                                                                                                                                                                                                                                                                                                                                                                                                                                                                                                                                                                                                                                                                                                                             | Statin                   | Antihypertensive         |        |                  |                           |                          |                          |                          |                               |                          |                          |                          |              |                          |                          |                          |                       |                          |                          |                          |                          |                          |                          |                          |
| Acutely by paramedic / GP                                                                                                          | <input type="checkbox"/>                                                                                                                                                                                                                                                                                                                                                                                                                                                                                                                                                                                                                                                                                                                                                                                                                                                                                 | <input type="checkbox"/> | <input type="checkbox"/> |        |                  |                           |                          |                          |                          |                               |                          |                          |                          |              |                          |                          |                          |                       |                          |                          |                          |                          |                          |                          |                          |
| As inpatients / in TIA clinic                                                                                                      | <input type="checkbox"/>                                                                                                                                                                                                                                                                                                                                                                                                                                                                                                                                                                                                                                                                                                                                                                                                                                                                                 | <input type="checkbox"/> | <input type="checkbox"/> |        |                  |                           |                          |                          |                          |                               |                          |                          |                          |              |                          |                          |                          |                       |                          |                          |                          |                          |                          |                          |                          |
| On discharge                                                                                                                       | <input type="checkbox"/>                                                                                                                                                                                                                                                                                                                                                                                                                                                                                                                                                                                                                                                                                                                                                                                                                                                                                 | <input type="checkbox"/> | <input type="checkbox"/> |        |                  |                           |                          |                          |                          |                               |                          |                          |                          |              |                          |                          |                          |                       |                          |                          |                          |                          |                          |                          |                          |
| In a follow-up clinic                                                                                                              | <input type="checkbox"/>                                                                                                                                                                                                                                                                                                                                                                                                                                                                                                                                                                                                                                                                                                                                                                                                                                                                                 | <input type="checkbox"/> | <input type="checkbox"/> |        |                  |                           |                          |                          |                          |                               |                          |                          |                          |              |                          |                          |                          |                       |                          |                          |                          |                          |                          |                          |                          |
| Deferred to primary care                                                                                                           | <input type="checkbox"/>                                                                                                                                                                                                                                                                                                                                                                                                                                                                                                                                                                                                                                                                                                                                                                                                                                                                                 | <input type="checkbox"/> | <input type="checkbox"/> |        |                  |                           |                          |                          |                          |                               |                          |                          |                          |              |                          |                          |                          |                       |                          |                          |                          |                          |                          |                          |                          |
| <p><b>What percentage of patients following</b></p>                                                                                | <p>Antihypertensives      ___      <input type="checkbox"/>0-20 <input type="checkbox"/>20-40 <input type="checkbox"/>40-60 <input type="checkbox"/>60-80 <input type="checkbox"/>80-100</p>                                                                                                                                                                                                                                                                                                                                                                                                                                                                                                                                                                                                                                                                                                             |                          |                          |        |                  |                           |                          |                          |                          |                               |                          |                          |                          |              |                          |                          |                          |                       |                          |                          |                          |                          |                          |                          |                          |

ESO / SAFE Survey on Secondary Prevention for Stroke

| <p><b>What percentage of stroke patients at follow up (≥12 months) have:</b></p> <p><i>if available, give exact number, otherwise select quintile by strikethrough)</i></p> <p><b>Is data from:</b>      <input type="checkbox"/> Estimation<br/> <input type="checkbox"/> Healthcare records   <input type="checkbox"/> Registry</p> | <p>BP recorded      _____ <input type="checkbox"/>0-20   <input type="checkbox"/>20-40   <input type="checkbox"/>40-60   <input type="checkbox"/>60-80   <input type="checkbox"/>80-100</p> <p>BP 'controlled'      _____ <input type="checkbox"/>0-20   <input type="checkbox"/>20-40   <input type="checkbox"/>40-60   <input type="checkbox"/>60-80   <input type="checkbox"/>80-100</p> <p>Cholesterol checked      _____ <input type="checkbox"/>0-20   <input type="checkbox"/>20-40   <input type="checkbox"/>40-60   <input type="checkbox"/>60-80   <input type="checkbox"/>80-100</p> <p>Statins      _____ <input type="checkbox"/>0-20   <input type="checkbox"/>20-40   <input type="checkbox"/>40-60   <input type="checkbox"/>60-80   <input type="checkbox"/>80-100</p> <p>Antiplatelets (non-AF)      _____ <input type="checkbox"/>0-20   <input type="checkbox"/>20-40   <input type="checkbox"/>40-60   <input type="checkbox"/>60-80   <input type="checkbox"/>80-100</p> <p>Anticoagulation (AF)      _____ <input type="checkbox"/>0-20   <input type="checkbox"/>20-40   <input type="checkbox"/>40-60   <input type="checkbox"/>60-80   <input type="checkbox"/>80-100</p> <p>DOACs (AF)      _____ <input type="checkbox"/>0-20   <input type="checkbox"/>20-40   <input type="checkbox"/>40-60   <input type="checkbox"/>60-80   <input type="checkbox"/>80-100</p> <p>Diabetic treatment      _____ <input type="checkbox"/>0-20   <input type="checkbox"/>20-40   <input type="checkbox"/>40-60   <input type="checkbox"/>60-80   <input type="checkbox"/>80-100</p> |           |         |           |                        |       |       |                  |       |       |                                 |       |       |             |       |       |                               |       |       |                       |       |       |                                   |       |       |                       |       |       |
|---------------------------------------------------------------------------------------------------------------------------------------------------------------------------------------------------------------------------------------------------------------------------------------------------------------------------------------|---------------------------------------------------------------------------------------------------------------------------------------------------------------------------------------------------------------------------------------------------------------------------------------------------------------------------------------------------------------------------------------------------------------------------------------------------------------------------------------------------------------------------------------------------------------------------------------------------------------------------------------------------------------------------------------------------------------------------------------------------------------------------------------------------------------------------------------------------------------------------------------------------------------------------------------------------------------------------------------------------------------------------------------------------------------------------------------------------------------------------------------------------------------------------------------------------------------------------------------------------------------------------------------------------------------------------------------------------------------------------------------------------------------------------------------------------------------------------------------------------------------------------------------------------------------------------------------------------|-----------|---------|-----------|------------------------|-------|-------|------------------|-------|-------|---------------------------------|-------|-------|-------------|-------|-------|-------------------------------|-------|-------|-----------------------|-------|-------|-----------------------------------|-------|-------|-----------------------|-------|-------|
| <p><b>In your country, how many centres offer these interventions, and how many are performed yearly?</b></p> <p><b>Is data from:</b>      <input type="checkbox"/> Estimation<br/> <input type="checkbox"/> Healthcare records   <input type="checkbox"/> Registry</p>                                                               | <table border="1"> <thead> <tr> <th></th> <th>Centres</th> <th>Performed</th> </tr> </thead> <tbody> <tr> <td>Carotid Endarterectomy</td> <td>_____</td> <td>_____</td> </tr> <tr> <td>Carotid Stenting</td> <td>_____</td> <td>_____</td> </tr> <tr> <td>Vertebral / intracranial stents</td> <td>_____</td> <td>_____</td> </tr> <tr> <td>PFO closure</td> <td>_____</td> <td>_____</td> </tr> <tr> <td>Left atrial appendage closure</td> <td>_____</td> <td>_____</td> </tr> <tr> <td>Neurosurgery for AVMs</td> <td>_____</td> <td>_____</td> </tr> <tr> <td>Interventional treatment for AVMs</td> <td>_____</td> <td>_____</td> </tr> <tr> <td> radiosurgery for AVMs</td> <td>_____</td> <td>_____</td> </tr> </tbody> </table>                                                                                                                                                                                                                                                                                                                                                                                                                                                                                                                                                                                                                                                                                                                                                                                                                                                           |           | Centres | Performed | Carotid Endarterectomy | _____ | _____ | Carotid Stenting | _____ | _____ | Vertebral / intracranial stents | _____ | _____ | PFO closure | _____ | _____ | Left atrial appendage closure | _____ | _____ | Neurosurgery for AVMs | _____ | _____ | Interventional treatment for AVMs | _____ | _____ | radiosurgery for AVMs | _____ | _____ |
|                                                                                                                                                                                                                                                                                                                                       | Centres                                                                                                                                                                                                                                                                                                                                                                                                                                                                                                                                                                                                                                                                                                                                                                                                                                                                                                                                                                                                                                                                                                                                                                                                                                                                                                                                                                                                                                                                                                                                                                                           | Performed |         |           |                        |       |       |                  |       |       |                                 |       |       |             |       |       |                               |       |       |                       |       |       |                                   |       |       |                       |       |       |
| Carotid Endarterectomy                                                                                                                                                                                                                                                                                                                | _____                                                                                                                                                                                                                                                                                                                                                                                                                                                                                                                                                                                                                                                                                                                                                                                                                                                                                                                                                                                                                                                                                                                                                                                                                                                                                                                                                                                                                                                                                                                                                                                             | _____     |         |           |                        |       |       |                  |       |       |                                 |       |       |             |       |       |                               |       |       |                       |       |       |                                   |       |       |                       |       |       |
| Carotid Stenting                                                                                                                                                                                                                                                                                                                      | _____                                                                                                                                                                                                                                                                                                                                                                                                                                                                                                                                                                                                                                                                                                                                                                                                                                                                                                                                                                                                                                                                                                                                                                                                                                                                                                                                                                                                                                                                                                                                                                                             | _____     |         |           |                        |       |       |                  |       |       |                                 |       |       |             |       |       |                               |       |       |                       |       |       |                                   |       |       |                       |       |       |
| Vertebral / intracranial stents                                                                                                                                                                                                                                                                                                       | _____                                                                                                                                                                                                                                                                                                                                                                                                                                                                                                                                                                                                                                                                                                                                                                                                                                                                                                                                                                                                                                                                                                                                                                                                                                                                                                                                                                                                                                                                                                                                                                                             | _____     |         |           |                        |       |       |                  |       |       |                                 |       |       |             |       |       |                               |       |       |                       |       |       |                                   |       |       |                       |       |       |
| PFO closure                                                                                                                                                                                                                                                                                                                           | _____                                                                                                                                                                                                                                                                                                                                                                                                                                                                                                                                                                                                                                                                                                                                                                                                                                                                                                                                                                                                                                                                                                                                                                                                                                                                                                                                                                                                                                                                                                                                                                                             | _____     |         |           |                        |       |       |                  |       |       |                                 |       |       |             |       |       |                               |       |       |                       |       |       |                                   |       |       |                       |       |       |
| Left atrial appendage closure                                                                                                                                                                                                                                                                                                         | _____                                                                                                                                                                                                                                                                                                                                                                                                                                                                                                                                                                                                                                                                                                                                                                                                                                                                                                                                                                                                                                                                                                                                                                                                                                                                                                                                                                                                                                                                                                                                                                                             | _____     |         |           |                        |       |       |                  |       |       |                                 |       |       |             |       |       |                               |       |       |                       |       |       |                                   |       |       |                       |       |       |
| Neurosurgery for AVMs                                                                                                                                                                                                                                                                                                                 | _____                                                                                                                                                                                                                                                                                                                                                                                                                                                                                                                                                                                                                                                                                                                                                                                                                                                                                                                                                                                                                                                                                                                                                                                                                                                                                                                                                                                                                                                                                                                                                                                             | _____     |         |           |                        |       |       |                  |       |       |                                 |       |       |             |       |       |                               |       |       |                       |       |       |                                   |       |       |                       |       |       |
| Interventional treatment for AVMs                                                                                                                                                                                                                                                                                                     | _____                                                                                                                                                                                                                                                                                                                                                                                                                                                                                                                                                                                                                                                                                                                                                                                                                                                                                                                                                                                                                                                                                                                                                                                                                                                                                                                                                                                                                                                                                                                                                                                             | _____     |         |           |                        |       |       |                  |       |       |                                 |       |       |             |       |       |                               |       |       |                       |       |       |                                   |       |       |                       |       |       |
| radiosurgery for AVMs                                                                                                                                                                                                                                                                                                                 | _____                                                                                                                                                                                                                                                                                                                                                                                                                                                                                                                                                                                                                                                                                                                                                                                                                                                                                                                                                                                                                                                                                                                                                                                                                                                                                                                                                                                                                                                                                                                                                                                             | _____     |         |           |                        |       |       |                  |       |       |                                 |       |       |             |       |       |                               |       |       |                       |       |       |                                   |       |       |                       |       |       |
| <p><b>For patients needing carotid intervention, when does it happen?</b></p> <p><i>if available, give number, otherwise select quintile by strikethrough)</i></p> <p><b>Is data from:</b>      <input type="checkbox"/> Estimation<br/> <input type="checkbox"/> Healthcare records   <input type="checkbox"/> Registry</p>          | <p>Within 48 hours      _____ <input type="checkbox"/>0-20   <input type="checkbox"/>20-40   <input type="checkbox"/>40-60   <input type="checkbox"/>60-80   <input type="checkbox"/>80-100</p> <p>Within 1 week      _____ <input type="checkbox"/>0-20   <input type="checkbox"/>20-40   <input type="checkbox"/>40-60   <input type="checkbox"/>60-80   <input type="checkbox"/>80-100</p> <p>Within 2 weeks      _____ <input type="checkbox"/>0-20   <input type="checkbox"/>20-40   <input type="checkbox"/>40-60   <input type="checkbox"/>60-80   <input type="checkbox"/>80-100</p> <p>Within 1 month      _____ <input type="checkbox"/>0-20   <input type="checkbox"/>20-40   <input type="checkbox"/>40-60   <input type="checkbox"/>60-80   <input type="checkbox"/>80-100</p> <p>&gt; 1 months      _____ <input type="checkbox"/>0-20   <input type="checkbox"/>20-40   <input type="checkbox"/>40-60   <input type="checkbox"/>60-80   <input type="checkbox"/>80-100</p>                                                                                                                                                                                                                                                                                                                                                                                                                                                                                                                                                                                                         |           |         |           |                        |       |       |                  |       |       |                                 |       |       |             |       |       |                               |       |       |                       |       |       |                                   |       |       |                       |       |       |

**PART 5. FOLLOW UP FOR PREVENTION OF STROKE**

|                                                                                                                                                                                                                                                                                                                                          |                                                                                                                                                                                                                                                                                                                                                                                                                                                                                                                                                                                                                                                                                                                                                                                           |
|------------------------------------------------------------------------------------------------------------------------------------------------------------------------------------------------------------------------------------------------------------------------------------------------------------------------------------------|-------------------------------------------------------------------------------------------------------------------------------------------------------------------------------------------------------------------------------------------------------------------------------------------------------------------------------------------------------------------------------------------------------------------------------------------------------------------------------------------------------------------------------------------------------------------------------------------------------------------------------------------------------------------------------------------------------------------------------------------------------------------------------------------|
| <p><b>Which guidelines in use in your country recommend follow-up of patients with stroke?</b></p>                                                                                                                                                                                                                                       | <p><input type="checkbox"/> ESO   <input type="checkbox"/> National   <input type="checkbox"/> None   <input type="checkbox"/> Other_____</p>                                                                                                                                                                                                                                                                                                                                                                                                                                                                                                                                                                                                                                             |
| <p><b>What proportion of patients are followed-up to for review of secondary prevention of stroke?</b></p> <p><i>(if available, give exact number, or select quintile)</i></p> <p><b>Is data from:</b>      <input type="checkbox"/> Estimation<br/> <input type="checkbox"/> Healthcare records   <input type="checkbox"/> Registry</p> | <p>In hospital      _____ <input type="checkbox"/>0-20   <input type="checkbox"/>20-40   <input type="checkbox"/>40-60   <input type="checkbox"/>60-80   <input type="checkbox"/>80-100</p> <p>Dedicated clinic      _____ <input type="checkbox"/>0-20   <input type="checkbox"/>20-40   <input type="checkbox"/>40-60   <input type="checkbox"/>60-80   <input type="checkbox"/>80-100</p> <p>In primary care      _____ <input type="checkbox"/>0-20   <input type="checkbox"/>20-40   <input type="checkbox"/>40-60   <input type="checkbox"/>60-80   <input type="checkbox"/>80-100</p> <p>No follow up      _____ <input type="checkbox"/>0-20   <input type="checkbox"/>20-40   <input type="checkbox"/>40-60   <input type="checkbox"/>60-80   <input type="checkbox"/>80-100</p> |
| <p><b>If followed up in secondary care, how long are most patients with stroke followed up?</b></p>                                                                                                                                                                                                                                      | <p>No follow up      <input type="checkbox"/></p> <p>≤6 weeks      <input type="checkbox"/></p> <p>6-26 weeks      <input type="checkbox"/></p> <p>6-12 months      <input type="checkbox"/></p> <p>&gt; 1 year      <input type="checkbox"/></p>                                                                                                                                                                                                                                                                                                                                                                                                                                                                                                                                         |
| <p><b>Who establishes stroke support groups in your country?</b></p>                                                                                                                                                                                                                                                                     | <p>Not commonly available      <input type="checkbox"/></p> <p>Hospital      <input type="checkbox"/></p> <p>Primary Care      <input type="checkbox"/></p> <p>Stroke specific charities      _____ <input type="checkbox"/></p>                                                                                                                                                                                                                                                                                                                                                                                                                                                                                                                                                          |
