# Supplementary material for: Availability of secondary prevention services after stroke in Europe: An ESO/SAFE survey of national scientific societies and stroke experts
Source: PubMed Central journal article supplement (PMC6572590; doi:10.1177/2396987318816136), 2018-11-27
Supplement: Supplemental_Material5.pdf [file Supplemental_Material5.pdf]

**Availability of Secondary Prevention Services after Stroke in Europe: An ESO/SAFE survey of  
National Scientific Societies and Stroke Experts**

Webb AJS<sup>1</sup>, Heldner MR<sup>2</sup>, Aguiar de Sousa D,<sup>3</sup> Sandset EC,<sup>4</sup> Randall G,<sup>5</sup> Bejot Y,<sup>6</sup> van der  
Worp HB,<sup>7</sup> Caso V,<sup>8</sup> Fischer U<sup>2</sup>

**Webtable 1. Reported organisation of healthcare and research infrastructure in the secondary prevention of stroke.** Groups are compared by chi-squared tests. N=total number of responses to the question; n=number of countries with availability of measures; GDP=gross domestic product; BP=blood pressure; TTE=transthoracic echocardiography; TEE= transesophageal echocardiography;TCD=transcranial ultrasound.

|                      |                   | N  | GDP per capita      |                     |                     | All Respondents | p-value |
|----------------------|-------------------|----|---------------------|---------------------|---------------------|-----------------|---------|
|                      |                   |    | Lower tertile n (%) | Mid - Tertile n (%) | Upper tertile n (%) | n (%)           |         |
| Stroke Registry      | National          | 45 | 1 (7)               | 4 (27)              | 9 (60)              | 14 (31)         | 0.006   |
|                      | Hospital          | 45 | 6 (40)              | 8 (53)              | 8 (53)              | 22 (49)         | 0.7     |
|                      | Population-based  | 34 | 3 (33)              | 3 (27)              | 6 (43)              | 12 (35)         | 0.71    |
|                      | Health Admin      | 34 | 5 (50)              | 7 (70)              | 11 (79)             | 23 (68)         | 0.33    |
|                      | Prospective       | 34 | 4 (40)              | 7 (70)              | 14 (100)            | 25 (74)         | 0.004   |
| Guidelines           | ESO               | 46 | 11 (69)             | 13 (87)             | 14 (93)             | 38 (83)         | 0.17    |
|                      | AHA Stroke        | 46 | 10 (63)             | 11 (73)             | 13 (87)             | 34 (74)         | 0.31    |
|                      | National          | 46 | 13 (81)             | 13 (87)             | 12 (80)             | 38 (83)         | 0.88    |
| Healthcare Strategy  | Country-wide      | 46 | 6 (38)              | 9 (60)              | 10 (67)             | 25 (54)         | 0.23    |
|                      | Hospital only     | 46 | 6 (38)              | 2 (13)              | 4 (27)              | 12 (26)         | 0.31    |
|                      | Regional          | 46 | 2 (13)              | 3 (20)              | 7 (47)              | 12 (26)         | 0.08    |
| Reimbursement        | Lifestyle Courses | 44 | 4 (27)              | 0 (0)               | 7 (47)              | 11 (25)         | 0.015   |
|                      | TIA clinics       | 45 | 9 (60)              | 12 (80)             | 14 (93)             | 35 (78)         | 0.09    |
|                      | CEA               | 45 | 10 (67)             | 15 (100)            | 15 (100)            | 40 (89)         | 0.004   |
|                      | Carotid Stenting  | 45 | 9 (60)              | 15 (100)            | 13 (87)             | 37 (82)         | 0.014   |
|                      | LAA Closure       | 44 | 6 (40)              | 12 (86)             | 12 (80)             | 30 (68)         | 0.015   |
|                      | Standard Drugs    | 45 | 14 (93)             | 15 (100)            | 15 (100)            | 44 (98)         | 0.36    |
|                      | AF Monitor <72hr  | 45 | 9 (60)              | 15 (100)            | 14 (93)             | 38 (84)         | 0.005   |
|                      | AF Monitor >72hr  | 45 | 6 (40)              | 6 (40)              | 10 (67)             | 22 (49)         | 0.24    |
|                      | Loop recorder     | 45 | 3 (20)              | 7 (47)              | 10 (67)             | 20 (44)         | 0.036   |
|                      | PFO Closure       | 45 | 7 (47)              | 15 (100)            | 13 (87)             | 35 (78)         | 0.001   |
| Lifestyle Management | Combined          | 44 | 8 (53)              | 5 (36)              | 9 (60)              | 22 (50)         | 0.41    |
|                      | Physical Activity | 45 | 5 (33)              | 2 (13)              | 6 (40)              | 13 (29)         | 0.25    |
|                      | Smoking           | 45 | 6 (40)              | 8 (53)              | 15 (100)            | 29 (64)         | 0.002   |
|                      | Weight Loss       | 45 | 3 (20)              | 6 (40)              | 9 (60)              | 18 (40)         | 0.08    |

**Webfigure 1. Reported reimbursement policies for investigation and treatment for the secondary prevention of stroke.**

Countries were grouped according to whether they reported that reimbursement was usually available for 'minimum medical treatments' (antiplatelets, statins, blood-pressure lowering) only, most 'standard investigations and interventions' (imaging, carotid endarterectomy) and whether the majority of advanced investigations and treatments were reimbursed (cardiac monitoring >72hrs, PFO closure, DOACs, novel antiplatelets, carotid stenting, left atrial appendage closure, implantable loop recorders).

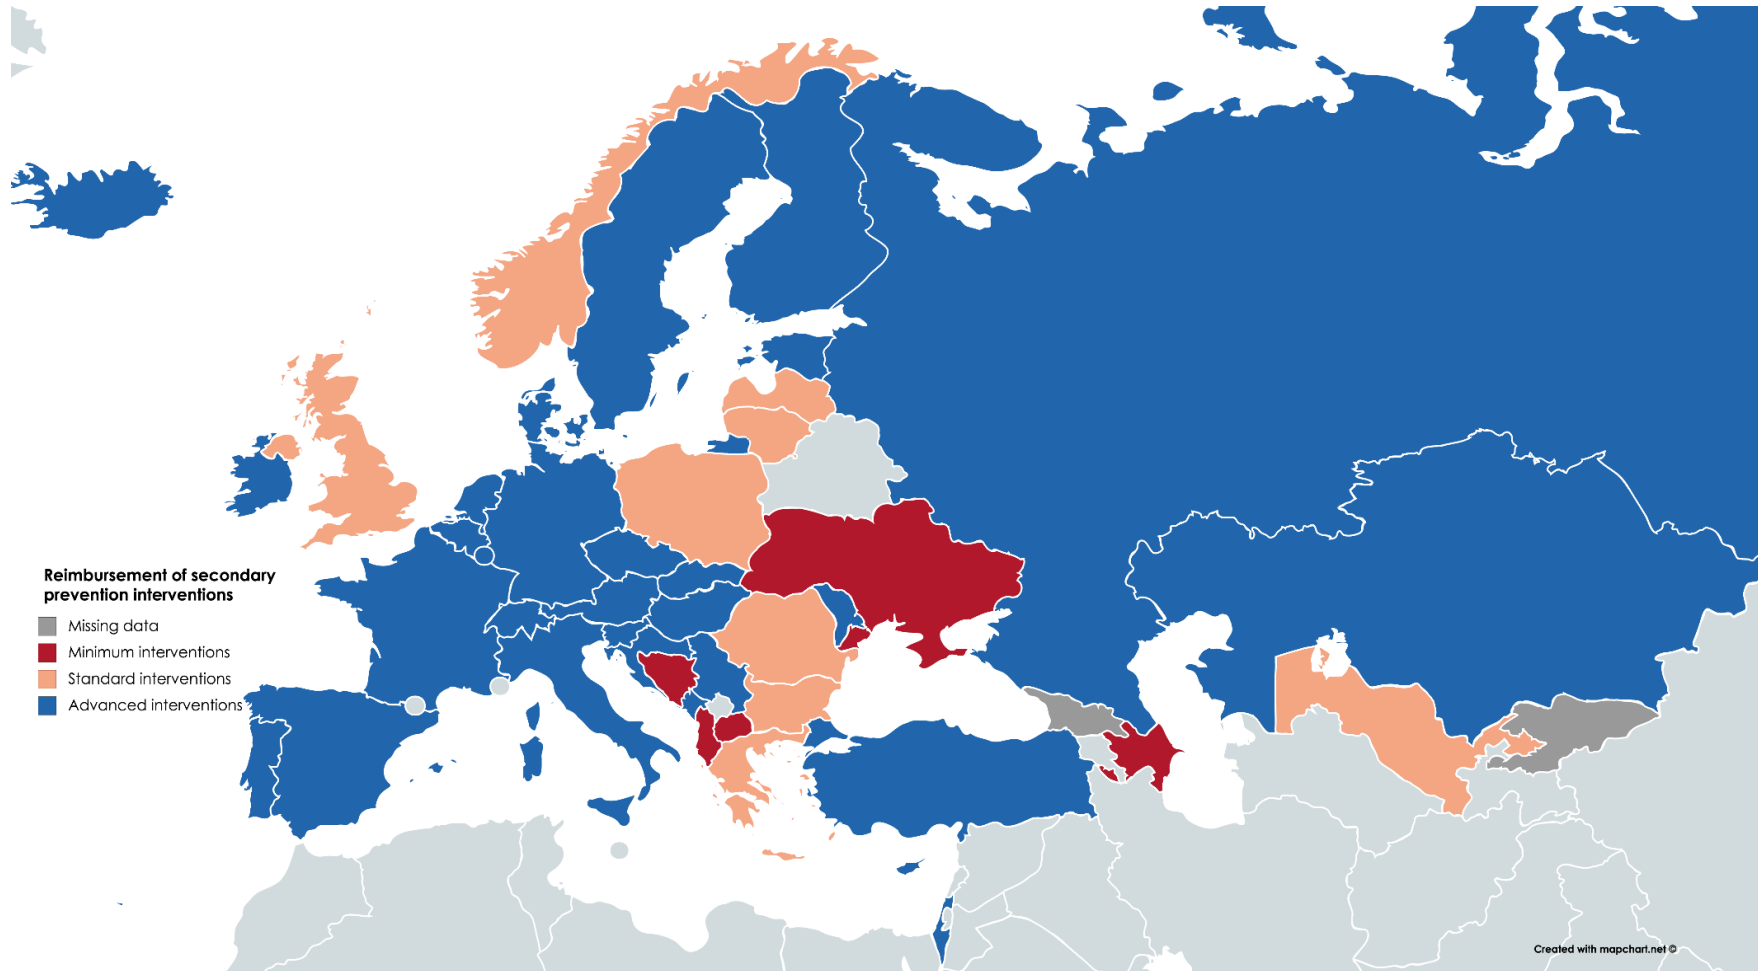

**Webtable 2. Reported availability of services to >40% of patients for secondary prevention risk assessment after TIA or stroke, according to tertile of national income.** Groups are compared by chi-squared tests. N=number of responses to the question; GDP=gross domestic product; BP=blood pressure; TTE=transthoracic echocardiography; TEE= transesophageal echocardiography;TCD=transcranial ultrasound.

|                         |                | N  | GDP per capita      |                     |                     | All Respondents | p-value |
|-------------------------|----------------|----|---------------------|---------------------|---------------------|-----------------|---------|
|                         |                |    | Lower tertile n (%) | Mid - Tertile n (%) | Upper tertile n (%) | n (%)           |         |
| TIA assessment location | Hospital       | 45 | 7 (44)              | 10 (67)             | 8 (57)              | 25 (56)         | 0.43    |
|                         | Stroke Team    | 43 | 3 (20)              | 9 (64)              | 8 (57)              | 20 (47)         | 0.036   |
|                         | TIA clinic     | 37 | 0 (0)               | 0 (0)               | 5 (36)              | 5 (14)          | 0.009   |
|                         | General Clinic | 41 | 4 (27)              | 0 (0)               | 1 (7)               | 5 (12)          | 0.09    |
|                         | Primary Care   | 41 | 4 (27)              | 1 (8)               | 0 (0)               | 5 (12)          | 0.08    |
| TIA assessment delay    | Same Day       | 44 | 5 (31)              | 8 (53)              | 5 (38)              | 18 (41)         | 0.45    |
|                         | Within 48hrs   | 44 | 6 (38)              | 6 (40)              | 6 (46)              | 18 (41)         | 0.89    |
|                         | Within 1 week  | 44 | 3 (19)              | 0 (0)               | 5 (38)              | 8 (18)          | 0.031   |
|                         | > 1 week       | 44 | 2 (13)              | 1 (7)               | 1 (8)               | 4 (9)           | 0.83    |
| Carotid Imaging         | Ultrasound     | 46 | 12 (75)             | 13 (87)             | 12 (80)             | 37 (80)         | 0.72    |
|                         | CT-angiogram   | 46 | 4 (25)              | 5 (33)              | 8 (53)              | 17 (37)         | 0.25    |
|                         | MR-angiogram   | 46 | 3 (19)              | 2 (13)              | 5 (33)              | 10 (22)         | 0.39    |
|                         | 2 modalities   | 43 | 3 (21)              | 3 (21)              | 5 (33)              | 11 (26)         | 0.70    |
| Cardiac Monitoring      | ECG only       | 42 | 12 (75)             | 5 (38)              | 2 (15)              | 19 (45)         | 0.005   |
|                         | 24-48 hours    | 45 | 9 (56)              | 13 (87)             | 11 (79)             | 33 (73)         | 0.14    |
|                         | > 48 hours     | 42 | 0 (0)               | 2 (14)              | 4 (29)              | 6 (14)          | 0.10    |
| BP monitoring           | Primary care   | 41 | 8 (57)              | 13 (87)             | 12 (100)            | 33 (80)         | 0.017   |
|                         | Hospital       | 42 | 4 (31)              | 6 (40)              | 4 (29)              | 14 (33)         | 0.79    |
|                         | Out-of-office  | 39 | 9 (75)              | 7 (50)              | 4 (31)              | 20 (51)         | 0.09    |
| Investigated with       | TTE            | 45 | 9 (60)              | 12 (80)             | 8 (53)              | 29 (64)         | 0.28    |
|                         | TEE            | 44 | 0 (0)               | 3 (20)              | 3 (21)              | 6 (14)          | 0.17    |
|                         | TCD            | 44 | 2 (13)              | 5 (36)              | 1 (7)               | 8 (18)          | 0.11    |
|                         | MRA / CTA      | 46 | 5 (31)              | 5 (33)              | 9 (60)              | 19 (41)         | 0.20    |

**Webfigure 2. Reported delay until assessment of more than 60% of patients presenting with a TIA.**

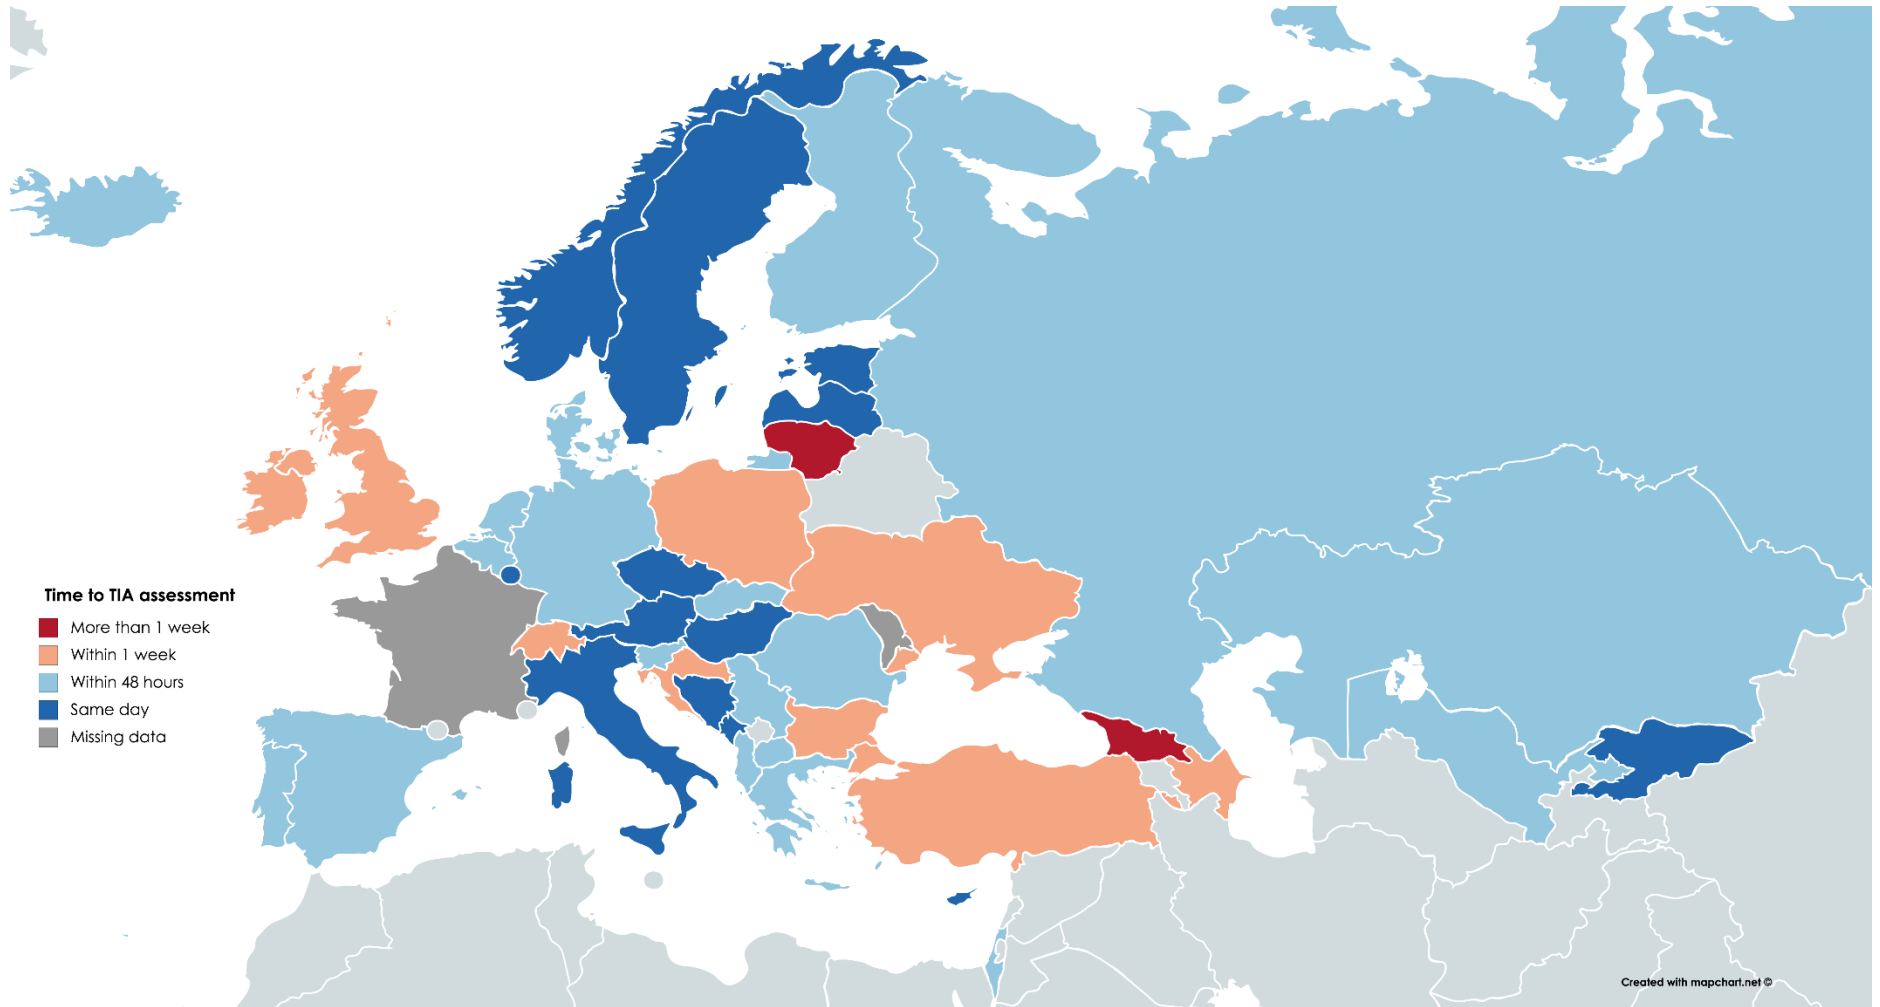

**Webtable 3. Reported availability of services to >40% of patients for treatments for secondary prevention after TIA or stroke, according to tertile of national income.** Groups are compared by chi-squared tests. N=number of responses to the question; GDP=gross domestic product; BP=blood pressure; TTE=transthoracic echocardiography; TEE= transesophageal echocardiography;TCD=transcranial ultrasound.

|                            |                   | N  | GDP per capita      |                     |                     | All Respondents<br>n (%) | p-value |
|----------------------------|-------------------|----|---------------------|---------------------|---------------------|--------------------------|---------|
|                            |                   |    | Lower tertile n (%) | Mid - Tertile n (%) | Upper tertile n (%) |                          |         |
| Initial treatment includes | BP-lowering       | 46 | 16 (100)            | 15 (100)            | 15 (100)            | 46 (100)                 | -       |
|                            | Statin            | 46 | 12 (75)             | 14 (93)             | 15 (100)            | 41 (89)                  | 0.07    |
|                            | Antiplatelet      | 46 | 16 (100)            | 15 (100)            | 15 (100)            | 46 (100)                 | -       |
| Carotid intervention       | < 48 hours        | 36 | 0 (0)               | 1 (7)               | 1 (9)               | 2 (6)                    | 0.61    |
|                            | < 1 week          | 37 | 2 (18)              | 2 (14)              | 5 (42)              | 9 (24)                   | 0.23    |
|                            | < 2 weeks         | 39 | 3 (27)              | 8 (62)              | 10 (67)             | 21 (54)                  | 0.11    |
|                            | < 1 month         | 34 | 6 (55)              | 4 (31)              | 3 (30)              | 13 (38)                  | 0.40    |
|                            | > 1 month         | 33 | 6 (50)              | 0 (0)               | 0 (0)               | 6 (18)                   | 0.002   |
| Treatment at 1 year        | BP measured       | 42 | 14 (88)             | 14 (100)            | 11 (92)             | 39 (93)                  | 0.41    |
|                            | BP controlled     | 43 | 12 (75)             | 13 (93)             | 11 (85)             | 36 (84)                  | 0.42    |
|                            | Lipids tested     | 42 | 12 (75)             | 14 (100)            | 10 (83)             | 36 (86)                  | 0.14    |
|                            | Statin            | 43 | 10 (63)             | 12 (86)             | 11 (85)             | 33 (77)                  | 0.23    |
|                            | Antiplatelet      | 43 | 15 (94)             | 14 (100)            | 12 (92)             | 41 (95)                  | 0.59    |
|                            | Anticoagulant     | 42 | 8 (50)              | 12 (86)             | 7 (58)              | 27 (64)                  | 0.11    |
|                            | DOAC              | 40 | 4 (27)              | 7 (50)              | 6 (55)              | 17 (43)                  | 0.28    |
| Follow up method           | Hospital          | 43 | 6 (43)              | 5 (36)              | 8 (53)              | 19 (44)                  | 0.63    |
|                            | Specialist clinic | 39 | 2 (17)              | 2 (17)              | 2 (13)              | 6 (15)                   | 0.96    |
|                            | Primary care      | 43 | 5 (36)              | 13 (93)             | 14 (93)             | 32 (74)                  | <0.001  |
|                            | No follow-up      | 37 | 2 (17)              | 1 (9)               | 1 (7)               | 4 (11)                   | 0.72    |
